# Supplementary material for: Progression of Chronic Kidney Disease and All-Cause Mortality in Patients with Tricuspid Regurgitation
Source: Diseases. 2022 Mar 16;10(1):16. doi: 10.3390/diseases10010016 (PMC8946925; doi:10.3390/diseases10010016)
Supplement: Supplementary file 1 [file diseases-10-00016-s001.zip › diseases-1621293-supplementary.pdf]

**Table S1** – Literature search for “tricuspid regurgitation” and “chronic kidney disease” and “mortality”

| Reference                                  | Study Design                                                                          | Patients          | Follow-up time | Primary endpoint                        | Patients                                                                      | Incidence CKD ≥3   | Independent predictors of CKD | Independent predictors of CKD progression | Independent predictors of mortality                                                                               | Further results                                                                                                                                                                                                     |
|--------------------------------------------|---------------------------------------------------------------------------------------|-------------------|----------------|-----------------------------------------|-------------------------------------------------------------------------------|--------------------|-------------------------------|-------------------------------------------|-------------------------------------------------------------------------------------------------------------------|---------------------------------------------------------------------------------------------------------------------------------------------------------------------------------------------------------------------|
| Ingraham BS et al. Heart 2019              | Retrospective observational cohort study                                              | N=87 patients     | 331 days       | -                                       | patients with severe TR considered for intervention                           | 64%                | -                             | -                                         | -                                                                                                                 | 30-day and 1-year survival were 100% and 76% / Patients with greater EROA, better RV function and more severe symptoms were more likely to receive intervention.                                                    |
| Dietz MF et al. Circulation 2019           | Retrospective cohort study                                                            | N=1,292 patients  | 34 months      | all-cause mortality                     | Patients with significant secondary TR                                        | -                  | -                             | -                                         | LVEF (OR 1.44), RV systolic pressure (OR 1.016), Baseline creatinine (OR 1.004)                                   | RV remodelling varies significantly: RV dilation and systolic dysfunction were present in 43% of patients,                                                                                                          |
| Mehr M et al. Jacc Cardiovasc Interv. 2019 | Multicentre international TriValve (Transcatheter Tricuspid Valve Therapies) registry | N=249 patients    | 1-year         | Clinical and echocardiographic outcomes | severe TR treated with edge-to-edge repair                                    | 6.8% (on dialysis) | -                             | -                                         | procedural failure OR 2.12, worsening kidney function OR 1.25 per 10ml/min eGFR, absence of sinus rhythm OR 4.40. | All cause mortality at 1-year follow-up 20%<br>Predictors of procedural failure: absence of central and/or anteroseptal TR jet location, larger coaptation gap size, larger tricuspid tenting area, and larger EROA |
| Benfari G et al. Circulation 2019          | Retrospective cohort study                                                            | N=13,026 patients |                | 5-year mortality                        | Mayo Clinic patients from 2003 to 2011 diagnosed with heart failure stage B-C | 36%                | -                             | -                                         | higher TR degree OR 1.09 for mild TR; 1.21 for moderate and 1.57 for severe TR                                    | TR was detected in 88% and was independently associated with impaired kidney function.                                                                                                                              |
| Bannehr M et al. J Cardiol 2019            | Retrospective observational cohort study                                              | N=213 patients    | 1458 days      | Long-term survival                      | consecutive patients considered PMVR                                          | 65%                | -                             | -                                         | post-procedural TR grade (OR 2.06), impaired LV function (OR3.1) CKD (OR4.0 – eGFR<30ml/min/1.73)                 | -                                                                                                                                                                                                                   |
| Omote K et al. J Card Fail 2019            | Multicentre Registry                                                                  | N=469 patients    | 748 days       | all-cause death                         | consecutive hospitalized patients with                                        | 52.5%              | -                             | -                                         | elevated TRPG as independent risk factor for mortality (OR1.02) -                                                 | Admission TRPG correlated with estimated pulmonary                                                                                                                                                                  |

|                                                                       |                                                |                   |              |                                                                                  | HFpEF +<br>measurement of<br>TRPG                                                                     |                                         |                                                                                                                                   |   | adjustment of renal<br>function                                                                                                                                                         | capillary wedge<br>pressure and left atrial<br>dimension                                                                                                                                                                |
|-----------------------------------------------------------------------|------------------------------------------------|-------------------|--------------|----------------------------------------------------------------------------------|-------------------------------------------------------------------------------------------------------|-----------------------------------------|-----------------------------------------------------------------------------------------------------------------------------------|---|-----------------------------------------------------------------------------------------------------------------------------------------------------------------------------------------|-------------------------------------------------------------------------------------------------------------------------------------------------------------------------------------------------------------------------|
| Murana G<br>et al. J<br>Cardiovasc<br>Thorac Surg<br>2018             | Retrospective<br>observational<br>cohort study | N=318<br>patients | 5.6 years    | Long-<br>term<br>survival                                                        | Patients with<br>mitral valve<br>replacement                                                          | 9.1%<br>(creatinin<br>e >200<br>μmol/L) | -                                                                                                                                 | - | Hypertension (OR 1.91),<br>COPD (OR 2.91) and<br>CKD (OR 5.27)                                                                                                                          | overall hospital<br>mortality rate was<br>4.4%                                                                                                                                                                          |
| Agricola E<br>et al. J<br>Cardiovasc<br>Med<br>(Hagerstow<br>n). 2017 | Retrospective<br>observational<br>cohort study | N=413<br>patients | 36<br>months | Long-<br>term<br>survival                                                        | Chronic heart<br>failure with<br>LVEF <50%                                                            | 48%                                     | Age (OR 1.1);<br>Diabetes (OR<br>1.2); AF (OR<br>1.8)<br>Reduced<br>LVEF (OR<br>0.97); NYHA<br>III-IV (OR<br>1.3)                 | - | CKD (OR 2.3),<br>Moderate/severe MR<br>(OR 1.6), NT-proBNP<br>(OR 1.3), NYHA III-IV<br>(OR 2.7), AF (OR 1.4)<br>ICD (OR 0.18),<br>TAPSE (<16 mm) (OR<br>1.3), Estimated RAP (OR<br>1.4) | combination of<br>significant functional<br>TR + right ventricular<br>dysfunction, but not<br>functional TR and<br>right ventricular<br>dysfunction alone, is<br>independently<br>associated with renal<br>dysfunction. |
| Omrani H<br>et al.<br>Med Arch<br>2016                                | Observationa<br>l cross-<br>sectional<br>study | N=150<br>patients | 1 year       | Echocardi<br>o-graphic<br>findings<br>before<br>first and<br>after 1-<br>year HD | Advanced<br>kidney disease<br>with upcoming<br>HD                                                     | 100%                                    | -                                                                                                                                 | - | -                                                                                                                                                                                       | prevalence of all<br>echocardiographic<br>findings was more<br>after the first dialysis<br>compared with before<br>the first dialysis in<br>diabetic patients<br>(P<0.05)                                               |
| Gluba-<br>Brzozka, A.,<br>et al. Lipids<br>Health Dis<br>2016         | Observationa<br>l cohort<br>study              | N=104<br>patients | -            | athero-<br>sclerosis<br>in CKD                                                   | patients<br>hospitalized<br>with CKD (N=80<br>patients (CKD I-<br>IV), N=24<br>healthy<br>volunteers) | 57,7%                                   | -                                                                                                                                 | - | -                                                                                                                                                                                       | tricuspid insufficiency<br>(27.3 % in CKD I/II vs.<br>71.4% in CKD V, p =<br>0.016)                                                                                                                                     |
| Bushyhead<br>D et al.<br>Liver<br>Transpl<br>2016                     | Retrospective<br>cohort study                  | N=397<br>patients | 5 years      | Long-<br>term<br>survival                                                        | liver transplant<br>recipients                                                                        | -                                       | Female (OR<br>0.53), Hyper-<br>tension (OR<br>2.33), Serum<br>Creatinine at<br>transplant<br>(OR 2.38),<br>LVEF ≥65%<br>(OR 1.75) | - | TR graded greater than<br>mild was associated<br>with significantly<br>increased posttransplant<br>mortality (OR 1.68);<br>smoking (OR 1.66)                                            | pretransplant<br>echocardiography may<br>be used as a tool to<br>risk-stratify patients<br>for posttransplant<br>outcomes                                                                                               |
| Taramasso<br>M et al. J<br>Card Surg                                  | Observationa<br>l cohort<br>study              | N=61<br>patients  | 3.2 years    | all-cause<br>death                                                               | patients with<br>aortic valve<br>replacement                                                          | 13%                                     | -                                                                                                                                 | - | TR ≥= 3+ at follow-up<br>(OR 10.58),<br>preoperative NYHA                                                                                                                               | preoperative untreated<br>TR 2/4R improves or<br>remains stable in the                                                                                                                                                  |

|                                                  |                                                                         |                  |             |                                                                                           |                                                                                                             |                               |   |                                                                                                |                                                                                                                                            |                                                                                                                                                   |
|--------------------------------------------------|-------------------------------------------------------------------------|------------------|-------------|-------------------------------------------------------------------------------------------|-------------------------------------------------------------------------------------------------------------|-------------------------------|---|------------------------------------------------------------------------------------------------|--------------------------------------------------------------------------------------------------------------------------------------------|---------------------------------------------------------------------------------------------------------------------------------------------------|
| 2016                                             |                                                                         |                  |             |                                                                                           |                                                                                                             |                               |   |                                                                                                | class III– IV (OR 8.01)                                                                                                                    | majority of patients.                                                                                                                             |
| Navaneetha n SD et al. J Am Soc Nephrol. 2016    | Multicentre cohort study                                                | N=3,939 patients | 4.1 years   | Cardio-vascular events                                                                    | eGFRs of 20–70 ml/min per 1.73 m2                                                                           | 100%                          | - | -                                                                                              | Pulmonary hypertension (OR 1.38)                                                                                                           | Pulmonary hypertension and higher TRV and PASP are associated with adverse outcomes in CKD                                                        |
| Busch C, et al. Eur J Cardiothorac Surg. 2015    | Retrospective observational cohort study                                | N=97 patients    | 3.1 years   | Long-term survival                                                                        | Patients undergoing surgery for constrictive pericarditis                                                   | 27.2%                         | - | -                                                                                              | LVEF (35%< LVEF <55%) (OR 3.6), right ventricular dilatation (OR 3.5) long-term mortality: CAD (OR 6.4) CKD (OR 1.8), COPD (OR 4.2)        | Surgery for constrictive pericarditis is associated with a significant risk based on the poor preoperative patient status                         |
| Fernando M et al. J Thorac Cardiovasc Surg. 2014 | Multicentre Registry (Cardiothoracic surgical databases in 3 hospitals) | N=545 patients   | -           | Long-term survival                                                                        | Mixed cardiac surgery patients with and without valve surgery and with CKD                                  | -                             | - | eGFR <20 mL/min (OR 4.6) as the only predictor for starting permanent dialysis within 6 months | age (OR 1.4 per decade), emergency surgery (OR 7.0), redo surgery (OR 3.8), left ventricular impairment (moderate, OR 2.7; severe, OR 4.4) | emergency surgery (OR 2.7), tricuspid valve surgery (OR, 4.4), eGFR < 20 mL/min (OR, 3.8), independent predictors of early postoperative dialysis |
| Ohno Y et al. Heart J Cardiovasc Imaging 2014    | Observational cohort study                                              | N=146 patients   | 20 months   | freedom from death, surgery for mitral valve dysfunction, or grade ≥ 3+ MR at 12-month FU | MitraClip recipients -none/mild TR (N=99) - moderate/severe TR (N=47)                                       | 47.5% (TR 0/1) 57.4% (TR 2/3) | - | -                                                                                              | Combined Endpoint: mortality and re-hospitalization: baseline moderate/severe TR (OR: 2.67), CKD (OR: 3.16)                                | MitraClip led to improvement in MR, TR, and NYHA functional class in patients with baseline moderate/severe TR                                    |
| Ro S et al. J Thorac Cardiovasc Surg 2013        | Retrospective observational cohort study                                | N=959 patients   | 64.8 months | all-cause mortality                                                                       | patients with mild-to-moderate TR who underwent mitral valve surgery with or without concomitant TV repair. | <1%                           | - | -                                                                                              | Composite endpoint: Age (OR 1.04), AF (OR 1.66), Diabetes (OR 2.08), CKD (OR 4.28), LVEF (OR 0.76) Redo surgery (OR 2.52)                  | -                                                                                                                                                 |
| Langanay T et al. J Heart                        | Retrospective observational                                             | N= 442 patients  | NA          | all-cause mortality                                                                       | aged > or =80 years with aortic                                                                             | NA                            | - | -                                                                                              | AI (30%, p <0.004), NYHA class IV (20.5%,                                                                                                  | Mortality was also increased in case of                                                                                                           |

|                                 |                      |                                                                                                                                                                                                            |                                                                                                                                      |
|---------------------------------|----------------------|------------------------------------------------------------------------------------------------------------------------------------------------------------------------------------------------------------|--------------------------------------------------------------------------------------------------------------------------------------|
| Valve Dis. cohort study<br>2006 | valve<br>replacement | p < 0.001), left and right<br>heart failure (11.5% and<br>19.4%, p <0.02), CKD<br>(18.5%, p <0.04),<br>emergency (37.5%, p<br><0.001), LVEF (21.1%, p<br><0.004), and redo<br>surgery (35.3%, p<br><0.001) | associated coronary<br>revascularization<br>(11.6%), mitral or<br>tricuspid surgery<br>(20%) and ascending<br>aorta procedure (25%). |
|---------------------------------|----------------------|------------------------------------------------------------------------------------------------------------------------------------------------------------------------------------------------------------|--------------------------------------------------------------------------------------------------------------------------------------|

TR, tricuspid regurgitation; EROA, effective regurgitant orifice area; RV, right ventricular; LV, left ventricular; LVEF, left ventricular ejection fraction; OR, odds ratio; eGFR, estimated glomerular filtration rate; PMVR, percutaneous mitral valve repair; CKD, chronic kidney disease; HFpEF, Heart Failure with preserved Ejection Fraction; TRPG, tricuspid regurgitation pressure gradient; COPD, chronic obstructive pulmonary disease; AF, atrial fibrillation; MR, mitral regurgitation; ICD, implantable cardioverter defibrillator; TAPSE, tricuspid annular plain systolic excursion; RAP, right atrial pressure; HD, haemodialysis; TRV, tricuspid regurgitant velocity; PASP, Pulmonary arterial systolic pressure; CAD, coronary artery disease; FU, follow-up; AI, aortic insufficiency

**Table S2.** Research Checklist - STROBE 2007 Statement.

| Section/Topic            | Item # | Recommendation                                                                                                                                                                                               | Reported on page #        |
|--------------------------|--------|--------------------------------------------------------------------------------------------------------------------------------------------------------------------------------------------------------------|---------------------------|
| Title and abstract       | 1      | (a) Indicate the study’s design with a commonly used term in the title or the abstract                                                                                                                       | 1                         |
|                          |        | (b) Provide in the abstract an informative and balanced summary of what was done and what was found                                                                                                          | 1                         |
| Introduction             |        |                                                                                                                                                                                                              |                           |
| Background/rationale     | 2      | Explain the scientific background and rationale for the investigation being reported                                                                                                                         | 2                         |
| Objectives               | 3      | State specific objectives, including any prespecified hypotheses                                                                                                                                             | 2                         |
| Methods                  |        |                                                                                                                                                                                                              |                           |
| Study design             | 4      | Present key elements of study design early in the paper                                                                                                                                                      | 2                         |
| Setting                  | 5      | Describe the setting, locations, and relevant dates, including periods of recruitment, exposure, follow-up, and data collection                                                                              | 3                         |
| Participants             | 6      | (a) Give the eligibility criteria, and the sources and methods of selection of participants. Describe methods of follow-up                                                                                   | 3                         |
|                          |        | (b) For matched studies, give matching criteria and number of exposed and unexposed                                                                                                                          | NA                        |
| Variables                | 7      | Clearly define all outcomes, exposures, predictors, potential confounders, and effect modifiers. Give diagnostic criteria, if applicable                                                                     | 3                         |
| Data sources/measurement | 8*     | For each variable of interest, give sources of data and details of methods of assessment (measurement). Describe comparability of assessment methods if there is more than one group                         | 3                         |
| Bias                     | 9      | Describe any efforts to address potential sources of bias                                                                                                                                                    | 3                         |
| Study size               | 10     | Explain how the study size was arrived at                                                                                                                                                                    | flow chart                |
| Quantitative variables   | 11     | Explain how quantitative variables were handled in the analyses. If applicable, describe which groupings were chosen and why                                                                                 | 3                         |
|                          |        | (a) Describe all statistical methods, including those used to control for confounding                                                                                                                        | 4                         |
| Statistical methods      | 12     | (b) Describe any methods used to examine subgroups and interactions                                                                                                                                          | 4                         |
|                          |        | (c) Explain how missing data were addressed                                                                                                                                                                  | 4                         |
|                          |        | (d) If applicable, explain how loss to follow-up was addressed                                                                                                                                               | 4                         |
|                          |        | (e) Describe any sensitivity analyses                                                                                                                                                                        | NA                        |
| Results                  |        |                                                                                                                                                                                                              |                           |
| Participants             | 13*    | (a) Report numbers of individuals at each stage of study-e.g., numbers potentially eligible, examined for eligibility, confirmed eligible, included in the study, completing follow-up, and analysed         | flow chart                |
|                          |        | (b) Give reasons for non-participation at each stage                                                                                                                                                         | flow chart                |
|                          |        | (c) Consider use of a flow diagram                                                                                                                                                                           | flow chart                |
| Descriptive data         | 14*    | (a) Give characteristics of study participants (e.g., demographic, clinical, social) and information on exposures and potential confounders                                                                  | 5-7                       |
|                          |        | (b) Indicate number of participants with missing data for each variable of interest                                                                                                                          | 18-24 (Table subheadings) |
|                          |        | (c) Summarise follow-up time (e.g., average and total amount)                                                                                                                                                | 5-7                       |
| Outcome data             | 15*    | Report numbers of outcome events or summary measures over time                                                                                                                                               | 7                         |
| Main results             | 16     | (a) Give unadjusted estimates and, if applicable, confounder-adjusted estimates and their precision (eg, 95% confidence interval). Make clear which confounders were adjusted for and why they were included | 5-7                       |
|                          |        | (b) Report category boundaries when continuous variables were categorized                                                                                                                                    | 5-7                       |
|                          |        | (c) If relevant, consider translating estimates of relative risk into absolute risk for a meaningful time period                                                                                             | 8                         |
| Other analyses           | 17     | Report other analyses done —e.g., analyses of subgroups and interactions, and sensitivity analyses                                                                                                           | 9                         |
| Discussion               |        |                                                                                                                                                                                                              |                           |
| Key results              | 18     | Summarise key results with reference to study objectives                                                                                                                                                     | 10                        |

| <b>Limitations</b>       |    |                                                                                                                                                                            |    |
|--------------------------|----|----------------------------------------------------------------------------------------------------------------------------------------------------------------------------|----|
| Interpretation           | 20 | Give a cautious overall interpretation of results considering objectives, limitations, multiplicity of analyses, results from similar studies, and other relevant evidence | 10 |
| Generalisability         | 21 | Discuss the generalisability (external validity) of the study results                                                                                                      | 11 |
| <b>Other information</b> |    |                                                                                                                                                                            |    |
| Funding                  | 22 | Give the source of funding and the role of the funders for the present study and, if applicable, for the original study on which the present article is based              | 11 |

Note: An Explanation and Elaboration article discusses each checklist item and gives methodological background and published examples of transparent reporting. The STROBE checklist is best used in conjunction with this article (freely available on the Web sites of PLoS Medicine at <http://www.plosmedicine.org/>, Annals of Internal Medicine at <http://www.annals.org/>, and Epidemiology at <http://www.epidem.com/>). Information on the STROBE Initiative is available at [www.strobe-statement.org](http://www.strobe-statement.org).
